# Supplementary material for: Polyprotein strategy for stoichiometric assembly of nitrogen fixation components for synthetic biology
Source: PubMed Central journal article supplement — Proc Natl Acad Sci U S A. 2018 Jul 30;115(36):E8509–17. doi: 10.1073/pnas.1804992115 (PMC6130400; doi:10.1073/pnas.1804992115), 2018-07-30
Supplement: pnas.1804992115.sd02.pdf [file pnas.1804992115.sd02.pdf]

## Dataset S2 (Construct VIII of Fig. 3A)

TITLE Polyprotein strategy for stoichiometric assembly of nitrogen fixation components for synthetic biology

AUTHORS Jianguo Yang, Xiaqing Xie, Nan Xiang, Zhe-Xian Tian, Ray Dixon, Yi-Ping Wang

FEATURES                      Location/Qualifiers

source                        1..27022  
                              /organism="synthetic DNA construct"  
                              /lab\_host="Escherichia coli"  
                              /mol\_type="other DNA"

source                        5339..5359  
                              /organism="synthetic DNA construct"  
                              /lab\_host="Escherichia coli"  
                              /mol\_type="other DNA"

promoter                     75..107  
                              /note="tet promoter"  
                              /note="E. coli promoter for tetracycline efflux protein gene"

CDS                            155..1345  
                              /codon\_start=1  
                              /gene="tet"  
                              /product="tetracycline efflux protein"  
                              /note="Tc<sup>R</sup>"  
                              /note="confers resistance to tetracycline"  
                              /translation="MKSNNALIVILGTVTLDAVGIGLVMPVLPGLLRDIVHSDSIASHY  
                                  GVLLALYALMQFLCAPVLGALSDFRGRPVLLASLLGATIDYAIMATTPVLWILYAGRI  
                                  VAGITGATGAVAGAYIADITDGEDRARHFGLMSACFGVGMVAGPVAGLLGAISLHAPF  
                                  LAAAVLNGLNLLLGCFMQESHKGERRPMLRAFNPVSSFRWARGMTIVAALMTVFFIM  
                                  QLVGQVPAALWVIFGEDRFRWSATMIGLSLAVFGILHALAQAFVTGPATKRFGEKQAI I  
                                  AGMAADALGYVLLAFATRGWMAFPIMILLASGGIGMPALQAMLSRQVDDDHQQLQGS L  
                                  AALTSLTSITGPLIVTAIYAASASTWNGLAWIVGAALYLVLCPALRRGAWSRATST"

CDS                            complement(2379..3038)  
                              /codon\_start=1  
                              /gene="cat"  
                              /product="chloramphenicol acetyltransferase"  
                              /note="Cm<sup>R</sup>"  
                              /note="confers resistance to chloramphenicol"  
                              /translation="MEKKITGYTTVDISQWHRKEHFQAFQVAQCTYNQTVQLDITAF L  
                                  KTVKKNKHKFYPAFIHILARLMNAHPEFRMAMKDGELVIWDSVHPCYTVFHEQTETFSS  
                                  LWSEYHDDFRQFLHIYSQDVACYGENLAYFPKGF IENMFFVSANPWVSFTSFDLNVANM  
                                  DNFFAPVFTMGKYYTQGDKVLMLPLAIQVHHAVCDGFHVGRMLNELQQYCDEWQGGA"

promoter                     complement(3039..3141)  
                              /note="cat promoter"  
                              /note="promoter of the E. coli cat gene"

rep\_origin                   complement(3667..4212)  
                              /direction=LEFT  
                              /note="p15A ori"

/note="Plasmids containing the medium-copy-number p15A origin of replication can be propagated in E. coli cells that contain a second plasmid with the ColE1 origin."  
 terminator 4434..4449  
 /note="Terminator-nifE"  
 CDS 4496..5317  
 /codon\_start=1  
 /note="nifU"  
 /translation="MWNYSEKVKDHHFFNPRNARVVDNANAVGDVGSLSGCDALRLMLRV  
 DPQSEIIEEAGFQTFGCGSAIASSSALTELIIGHTLAEAGQITNQQIADYLDGLPPEKM  
 HCSVMGQEALRAAIANFRGESLEEEHDEGKLICKCFGVDEGHIRRAVQNNGLTTLAEVI  
 NYTKAGGGCTSCHEKIELALAEILAQQPQTTPAVASGKDPHWQSVVDTIAELRPHIQAD  
 GGDMLLSVTNHQVTVSLSGSCSGCMMTDMTLAWLQQKLMERTGCYMEVVA"  
 CDS 5318..5338  
 /codon\_start=1  
 /product="tobacco etch virus (TEV) protease recognition and cleavage site"  
 /note="TEV site"  
 /translation="ENLYFQS"  
 CDS 5339..5359  
 /codon\_start=1  
 /product="tobacco etch virus (TEV) protease recognition and cleavage site"  
 /note="TEV site"  
 /translation="ENLYFQS"  
 CDS 5360..6559  
 /codon\_start=1  
 /note="nifS"  
 /translation="KQVYLDNNATTRLDPMVLEAMMPFLTDFYGNPSSIHDFGIPAQAA  
 LERAHQQAAALLGAEYPSEIIFTSCATEATATAIASAIALLPERREIITSVVEHPATLA  
 ACEHLERQGYRIHRIAVDSEGALDMAQFRAALSPRVALVSMWANNETGVLFPIGEMAE  
 LAHEQGALFHCDAVQVVGKIPIAVGQTRIDMLSCSAHKFHGPKGVGCLYLRRGTRFRPL  
 LRGGHQEYGRRAGTENICGIVGMGAACELANIHLPGMTHIGQLRNRLEHRLLASVPSVM  
 VMGGQPRVPGTVNLAFEFIEGEAILLLLNQAGIAASSGSACTSGSLEPSHVMRAMNIP  
 YTAAHGTRFSLSRYTREKEIDYVVATLPPIIDRLRALSPYWQNGKPRPADAVFTPVYG  
 "  
 terminator 6580..6602  
 /note="Terminator-nifUF"  
 CDS 6903..7781  
 /codon\_start=1  
 /note="nifH"  
 /translation="MTMRQCAIYGKGGIGKSTTTQNLVAALAEMGKVMIVGCDPKADS  
 TRLILHAKAQNTIMEMAAEVGSVEDLELEDVLQIGYGDVRCAESGGPEPGVCAGRGI  
 TAINFLEEEGAYEDDLDFVFDVLDVCGGFAMP IRENKAQE IYIVCSGEMMAMYAAN  
 NISKGIVKYAKSGKVRLLGGLICNSRQTDREDELI IALAELKGTQMIHFVPRDNIVQRAE  
 IRRMTVIEYDPACKQANEYRTLAQKIVNNTMKVVPTPCTMDELESLLMEFGIMEEEDTS  
 IIGKTAEEENAA"  
 CDS 7782..7802

```

/codon_start=1
/product="tobacco etch virus (TEV) protease recognition and
cleavage site"
/note="TEV site"
/translation="ENLYFQS"
CDS 7803..7823
/codon_start=1
/product="tobacco etch virus (TEV) protease recognition and
cleavage site"
/note="TEV site"
/translation="ENLYFQS"
CDS 7824..9272
/codon_start=1
/note="nifD"
/translation="MMTNATGERNLALIQEVLEVPETARKERRKHMVSDPEMESVGK
CIISNRKSQPGVMTVRGCAYAGSKGVVFGPIKDMAHISHGPGCGQYSRAGRNNYITGV
SGVDSFGTLNFTSDFQERDIVFGGDKKLSKLIEMELLFPLTKGITIQSECPVGLIGDD
ISAVANASSKALDKPVIPVRCEGFRGVSQSLGHHIANDVVRDWILNNREGQPFETPYD
VAIIGDYNIGGDAWASRILLEEMGLRVVAQWSGDGTLVEMENTPFVKLNLVHCYRSMNY
IARHMEEKHQIPWMEYNFFGPTKIAESLRKIADQFDDTIRANAEAVIARYEGQMAAIIA
KYRPRLEGRKVLVLYMGLRPRHVI GAYEDLGMEIIAAGYEFANDDYDRTL PDLKEGTL
LFDDASSYELEAFVKALKPDLIGSGIKEKYIFQKMGVPPFRQMHSWDYSGPYHG YDGF AI
FARDMDMTLNNPAWNELTAPWLKSA"
CDS 9273..9293
/codon_start=1
/product="tobacco etch virus (TEV) protease recognition and
cleavage site"
/note="TEV site"
/translation="ENLYFQS"
CDS 9294..9314
/codon_start=1
/product="tobacco etch virus (TEV) protease recognition and
cleavage site"
/note="TEV site"
/translation="ENLYFQS"
CDS 9315..10877
/codon_start=1
/note="nifK"
/translation="MSQTIDKINSCYPLFEQDEYQELFRNKRQLEEAHDAQRVQEVFAW
TTTAEYEALNFQREALTVDPKACQPLGAVLCSLGFANTLPYVHGSQGCVAYFRTYFNR
HFKEPIACVSDSMTEDAAVFGGNNMNLGLQNASALYKPEIIAVSTTCMAEVI GDDLQA
FIANAKKDGFDVSSIAVPHAHTPSFIGSHVTGWDNMFEGFAKTFTADYQQGPGKLPKLN
LVTGFETYLG NFRVLKRMMEQMAVPCSLSDPSEVLDT PADGHYRMYSGGTTQQEMKEA
PDAIDTLLLQPWQLLKS KKVQEMWNQPATEVAIPLGLAATDELLMTVSQ LSGKPIADA
LTLERGR LVDMM LDSHTWLHGK KFGLYGDPDFVMGLTRFLLEL GCEPTVILSHNANKRW
QKAMNKMLDASPYGRDSEVF INCDLWHFRSLMFTRQPDFMIGNSYKGF IQRDTLAKGKA
FEVPLIRLGFPLFDRHHLHRQTTWGYEGAMNIVTTLVNAVLEKLDSDTSQLGKTDYSFD
LVR"

```

terminator 10897..10915  
 /note="Terminator1-nifH"  
 terminator 11014..11040  
 /note="Terminator2-nifH"  
 terminator 11101..11131  
 /note="Terminator-nifL"  
 CDS complement (11154..12557)  
 /codon\_start=1  
 /note="nifB"  
 /translation="TSCSSFSGGKACRPADDSALTPLVADKAAAHPCYSRHHHRFARM  
 HLPVAPACNLQCNYCNRFDCSNESRPGVSSSTLLTPEQAVVKVRQVAQAIPQLSVVGI  
 A GPGDPLANIARTFRTLELIREQLPDLKLCSTNGLMLPDAVDRLLDVGVHDVTVTINTL  
 DAETAAQIYAWLWLDGERYSGREAGEIL IARQLEGVRRLTAKGVLVKINSVLIPGINDS  
 GMADVSRALRASGAFIHNIMPLIARPEHGTVFGLNGQPEPDAETLAATRSRCDEVMPQM  
 THCHQCRADAIGMLGEDRSQQFTQLPAPESLPAWLPILHQAQLHASIATRGESEADDA  
 CLVAVASSRGDVIDCHF GHADRFYIYLSAAGMVLVNERFTP KYCQGRDDCEPQDNAAR  
 FAAILELLADV KAVFCVRIGHTPWQQLEQEGIEPCVDGAWRPVSEVLPAAWWQRRGSWP  
 AALPHKGVA"  
 CDS complement (12558..12602)  
 /codon\_start=1  
 /note="GGGGS X 3"  
 /translation="GGGSGGGSGGGGS"  
 CDS complement (12603..13985)  
 /codon\_start=1  
 /note="nifN"  
 /translation="MADIFRTDKPLAVSPIKGTGQPLGAILASLGLIEHSIPLVHGAQGCS  
 AFAKVFFIQHFHDPVPLQSTAMDPTSTIMGADGNIFTALDTLCQRNNPQAI VLLSTGLS  
 EAQGS DISRVVRQFREEYPRHKGVA ILLTVNTPDFY GSMENGFSAVLESVIEQWVPPAPR  
 PAQRNRRVNLVSHLCSPGDIEWLRRCVEAFGLQPIILPDLAQSMGHLAQGDFSPLTQ  
 GGTPLRQIEQMGSLSCSFAIGVSLHRASSLLAPRCRGEVIALPHLMTLERCDAFIHQLA  
 KISGRAVPEWLERQRGQLQDAMIDCHMWLQGQRMAIAAEGDLLAAWCDFANSQGMQPGP  
 LVAPTGHPSLRQLPVERVVPGDLEDLQTLCAHPADLLVANSHARDLAEQFALPLVRAG  
 FPLFDKLGEFRRVRQGYSGMRDTL FELANLIRERHHHLAHYRSPLRQNPESLSTGGAY  
 AAD"  
 CDS complement (13986..14006)  
 /codon\_start=1  
 /product="tobacco etch virus (TEV) protease recognition and  
 cleavage site"  
 /note="TEV site"  
 /translation="ENLYFQS"  
 CDS complement (14007..14027)  
 /codon\_start=1  
 /product="tobacco etch virus (TEV) protease recognition and  
 cleavage site"  
 /note="TEV site"  
 /translation="ENLYFQS"  
 CDS complement (14028..15398)  
 /codon\_start=1

```

/note="nifE"
/translation="MKGNEILALLDEPACEHNHKQKSGCSAPKPGATAGGCAFDGAQIT
LLPIADVAHLVHGPIGCAGSSWDNRGSASSGPTLNRLGFTTDLNEQDVIMGRGERLRFH
AVRHIVTRYHPAAVFIYNTCVPAMEGDDLEAVCQAAQTATGVPVIAIDAAGFYGSKNLG
NRLAGDVMVKRVIQREPAWPPESTLFAPEQRHDIGLIGEFNIAGEFWHIQPLDELGI
RVLGSLSGDGRFAEIQTMHRAQANMLVCSRALINVARALEQRYGTPWFEGSFYGIRATS
DALRQLAALLGDDDLRQRTEALIAREEQAAELALQPWREQLRGRKALLYTGGVKSWSVV
SALQDLGMTVVATGTRKSTEEDKQRIRELMGEEAVMLEEGNARTLLDVVYRYQADLMIA
GGRNMYTAYKARLPFLDINQEREHAFAGYQGIVTLARQLCQTINSP IWPQTHSRAPWR"
terminator 15558..15584
/note="Terminator2-nifH"
CDS complement(15632..17206)
/codon_start=1
/note="nifA"
/translation="MIHKSDSDTTVRRFDLSQQFTAMQRISVVLRSRTEASKTLQEVLS
VLHNDAFMQHGMI CLYDSQQEILSIEALQQTEDQTLPGSTQIRYRPGELVGTVLAQQG
SLVLPRVADDQRFLDRLSLYDYDLPFIAVPLMGPHSRPIGVLAHAMARQEERLPACTR
FLETVANLIAQTIRLMILPTSAAQAPQQSPRIERPRACTPSRGGFLENMVGKSPAMRQI
MDIIRQVSRWDTTVLVRGESGTGKELIANAIIHNSPRAAAAFVKFNCAALPDNLLESEL
FGHEKGAFTGAVRQRKGRFELADGGTLFLDEIGESSASFQAKLLRILQEGEMERVGGDE
TLRVNVRIIAATNRHLEEEVRLGHFREDLYRRLNVMPIALPLRERQEDIAELAHFLVR
KIAHSQGRTLRISDGAIRLLMEYSWPGNVRELENCLERSAVLSEGLIDRDVILFNHRD
NPPKALASSGPAEDGWLDNSLDERQRLIAALEKAGWVQAKAARLLGMTPRQVAYRIQIM
DITMPRL"
CDS complement(17203..18690)
/codon_start=1
/note="nifL"
/translation="MTLNMMLDNAVPEAIIAGALTQQHPGLFFTMVEQASVAISLTDARA
NITYANPAFCRQTGYSLAQLLNQNPRLASSQTPREIYQEMWQTLLQRQPWRGQLINQA
RDGGLYLVDIDITPVLNPQGELEHYLAMQRDISVSYTLEQRLRNHMTLMEAVLNNIPAA
VVVVDEQDRVMDNLAYKTFCADCGGKELLVELQVSPRKMGPQAEQILPVVVRGAVRWL
SVTCWALPGVSEEASRYFVDSAPARTLMVIADCTQQRQQQEQGRDLRLKQMTAGKLLA
AIRESLDAALIQLNCPINMLAAARRLNGEGSGNVALDAAWREGEEAMARLQRCRPSLEL
ESNAVWPLQPFDDLYALYRTRFDDRARLQVDMASPHLVGFGQRTQLLACLSLWLDRTL
ALAAELPSVPLEIELYAEEDGWLSTLYLNDNVPLLQVRYAHSPPDALNSPGKGMELRLIQ
TLVAYHRGAIELASRPQGGTSLVLRFPPLFNTLTGGEQ"
terminator 19080..19111
/note="Terminator-nifJ"
CDS complement(19161..19421)
/codon_start=1
/note="nifW"
/translation="MMEWFYQIPGVDELRSAESFFQFFAVPYQPELLGRCSLPVLATFH
RKLRAEVPLQNRLEDNDRAPWLLARRLLAESYQQQFQESGT"
CDS complement(19422..19442)
/codon_start=1
/product="tobacco etch virus (TEV) protease recognition and
cleavage site"
/note="TEV site"

```

CDS /translation="ENLYFQS"  
complement (19443..19463)  
/codon\_start=1  
/product="tobacco etch virus (TEV) protease recognition and  
cleavage site"  
/note="TEV site"

CDS /translation="ENLYFQS"  
complement (19464..20603)  
/codon\_start=1  
/note="nifV"  
/translation="MERVLINDTTLRDGEQSPGVAFRTSEKVAIAEALYAAGITAMEVG  
TPAMGDEEIARIQLVRRQLPDATLMTWCRMNALEIRQSADLGIDWVDISIPASDKLRQY  
KLREPLAVLLERLAMFIHLAHTLGLKVCIGCEDASRASGQTLRAIAEVAQQCAAARLY  
ADTVGLLDPFTTAAQISALRDVWSGEIEMHAHNDLGMATANTLAAVSAGATSVNTTVLG  
LGERAGNAALETVALGLERCLGVETGVHFSALPALCQRVAEAAQRAIDPQQPLVGELVF  
THESGVHVAALLRDSesyQSIAPSLMGRSRYLVLGKHSGRQAVNGVFDQMGYHLNAAQI  
NQLLPAIRRFAENWKRS PKDYELVAIYDEL CGESALRARG"

CDS complement (20604..20624)  
/codon\_start=1  
/product="tobacco etch virus (TEV) protease recognition and  
cleavage site"  
/note="TEV site"  
/translation="ENLYFQS"

CDS complement (20625..20645)  
/codon\_start=1  
/product="tobacco etch virus (TEV) protease recognition and  
cleavage site"  
/note="TEV site"  
/translation="ENLYFQS"

CDS complement (20646..24158)  
/codon\_start=1  
/note="nifJ"  
/translation="MSGKMTMDGNAAA AWISYAFTEVA AIYPITPSTPMAENVDEWAA  
QGKKNLFGQPVR LMEMQSEAGAAGAVH GALQAGAL TTTYTASQGLLLMIPNMYKIAGEL  
LPGVFHVSARALATNSLNI FGDHQDVM AVRQTGCAMLAENNVQQVMDLSAV AHLAAIKG  
RIPFVNFFDGFRTSHEIQKIEVLEYEQLATLLDRPALDSFRRNALHPDHPVIRGTAQNP  
DIYFQEREAGNRFYQALPDIVESYMTQISALTGREYHLFNYTGAADAERV I IAMGSVCD  
TVQEVDLNAAGEKVG LLSVHLFRPFS LAHFFAQLPKTVQRIAVLDRTKEPGAQAEPL  
CLDVKNAFYHHDDAPLIVGGRYALGGKDVLPNDIAAVFDNLNKPLPMDGFTLGI VDDVT  
FTSLPPRQQTLAVSHDGITACKFWGMGSDGTVGANKSAIKIIGDKTPLYAQAYFSYDSK  
KSGGITVSHLRFGDRPINSPYLIHRADFISCSQQSYVERYDLLDGLKPGGTFLNCSWS  
DAELEQHLPVGFKRYLARENIFHYTLNAVDIARELGLGGRFNMLMQAAFFKLA AIIDPQ  
TAADYLKQAVEKSYGSKGAAVIEMNQRAIELGMASLHQVTIPAHWATLDEPAAQASAMM  
PDFIRDILQPMNRQCGDQLPVSAFVGMEDGTFPSGTAAWEKRGIALEVPVWQPEGCTQC  
NQCAFICPHAAIRPALLNGEEHDAAPVGLLSKPAQGAKEYHYHLAISPLDCSGCGNCVD  
ICPARGKALKMQSLDSQRQMAPVWDYALALTPKSNPFRKTTVKGSQFETPLLEFSGACA  
GCGETPYARLITQLFGDRMLIANATGCSSIWGASAPSI PYTTNHRGHGPAWANS LFEDN  
AEFGLGMM LGGQAVRQQIADDMTAAALALPVSDELSDAMRQLAKQDEGE TRERADRLS

```

ERLAAEKEGVPLLEQLWQNRDYFVRRSQWIFGGDGWAYDIGFGGLDHVLASGEDVNILV
FDTEVYSNTGGQSSKSTPVAAIKFAAQGKRTRKKDLGMMMSYGVVYAQVAMGADKD
QTLRAIAEAEAWPGPSLVIAYAACINHGLKAGMRCSQREAKRAVEAGYWHLWRYHPQRE
AEGKTPFMLDSEEPESFRDFLLGEVRYASLHKTTPHLADALFSRTEEDARARFAQYRR
LAGEE"
terminator 24551..24570
            /note="Terminator-nifB"
CDS        complement(24604..25266)
            /codon_start=1
            /note="nifY"
            /translation="MSDNDTLFWRMLALFQSLPDLQPAQIVDWLAQESGETLTPERLAT
            LTQPQLAASFPSATAVMSPARWSRVMASLQGALPAHLRIVRPAQRTPQLLAAFCSQDGL
            VINGHFGQGRLFFIYAFDEQGGWLYDLRRYPSAPHQEQANEVRARLIEDCQLLFCQEIG
            GPAAARLIRHRIHPMKAQPGTTIQAQCEAINTLLAGRLPPWLAKRLNRDNPLEERVF"
CDS        complement(25267..25287)
            /codon_start=1
            /product="tobacco etch virus (TEV) protease recognition and
            cleavage site"
            /note="TEV site"
            /translation="ENLYFQS"
CDS        complement(25288..25308)
            /codon_start=1
            /product="tobacco etch virus (TEV) protease recognition and
            cleavage site"
            /note="TEV site"
            /translation="ENLYFQS"
CDS        complement(25309..26106)
            /codon_start=1
            /note="nifM"
            /translation="MNPWQRFARQRLARSRWNRDPAALDPADTPAFEQAWQRQCHMEQT
            IVARVPEGDIPAALLENIAASLAIWLDEGDFAPPERAAIVRHHARLELAFADIARQAPQ
            PDLSTVQAWYLRHQTFMRPEQRLTRHLLLTVDNDREAVHQRILGLYRQINASRDAFAP
            LAQRHSHCPSALEEGRLGWISRGLLYPQLETALFSLAENALSLPIASELGHLLWCEAI
            RPAAPMEPQQALESARDYLWQQSQQRHQRWLEQMISRQPGLCG"
CDS        complement(26107..26127)
            /codon_start=1
            /product="tobacco etch virus (TEV) protease recognition and
            cleavage site"
            /note="TEV site"
            /translation="ENLYFQS"
CDS        complement(26128..26148)
            /codon_start=1
            /product="tobacco etch virus (TEV) protease recognition and
            cleavage site"
            /note="TEV site"
            /translation="ENLYFQS"
CDS        complement(26149..26676)
            /codon_start=1

```

/note="nifF"

/translation="MANIGIFFGTDGKTRKIAKMIHKQLGELADAPVNINRTTLDDFM  
AYPVLLLTPTLGDGQLPGLGCESESWSEFISGLDDASLKGKTVLFLGLDQRGYPD  
NFVSGMRPLFDALSARGAQMIGSWPNEGYESASSALEGDRFVGLVLDQDNQFDQTEAR  
LASWLEEIKRTVL"

ORIGIN

1 tttcagtgca atttatctct tcaaatgtag cacctctagt cagccccata cgatataagt  
61 tgtaattctc atgtttgaca gcttatcgat cgaataagca cttaaatgcg gtagtttatac  
121 acagttaaat tgctaacgca gtcaggcacc gtgtatgaaa tctaacaatg cgctcatcgt  
181 catcctcggc accgtcacc tggatgctgt aggcataggc ttggttatgc cggtagctgc  
241 gggcctcttg cgggatatcg tccattccga cagcatcgcc agtcactatg gcgtgctgct  
301 ggcgctatat gcgttgatgc aatttctatg cgcacccggt ctccggagcac tgtccgaccg  
361 ctttggccgc cgcccagtcc tgctcgcttc gctacttga gccactatcg actacgcgat  
421 catggcgacc acacccgtcc tgtggatect ctacgccgga cgcacgtggt ccggcateac  
481 cggcgccaca ggtgcggttg ctggcgcta tatcgccgac atcaccgatg gggaagatcg  
541 ggctcgccac ttcgggctca tgagcgcttg ttcggcgtg ggtatggtg caggccccgt  
601 ggccggggga ctgttgggcg ccatctcctt gcatgcacca ttccttgcgg cggcggtgct  
661 caacggcctc aacctactac tgggctgctt cctaagcag gagtcgcata agggagagcg  
721 tcgaccgatg cccttgagag ccttcaacc agtcagctcc ttccgggtggg cgcggggcat  
781 gactatcgtc gccgcactta tgactgtctt cttatcatg caactcgtag gacaggtgcc  
841 ggcagcgctc tgggtcattt tcggcgagga ccgcttctgc tggagcgca cgatgatcgg  
901 cctgtcgtt gcggtattcg gaatcttga cgcctcget caagccttcg tcaactgtcc  
961 cgccaccaa cgtttcggcg agaagcaggc cattatcgcc ggcatggcgg ccgacgcgt  
1021 gggctacgtc ttgctggcgt tcgcgacgcg aggetggatg gcttccccca ttatgattct  
1081 tctcgttcc ggccgcatcg ggatgcccgc gttgcaggcc atgctgtcca ggcaggtaga  
1141 tgacgaccat cagggacagc ttcaaggatc gctcgcggt cttaccagcc taacttcgat  
1201 cactggaccg ctgatcgtca cggcgattta tgccgctcg gcgagcaca ggaacgggtt  
1261 ggcatggatt gtaggcgccg ccctatacct tgtctgcctc cccgcgttgc gtcgcggtgc  
1321 atggagccgg gccacctga cctgaatgga agccggcggc acctcgctaa cggattcacc  
1381 actccaagaa ttggagccaa tcaattcttg cggagaactg tgaatgcga aaccaacct  
1441 tggcagaaca tatccatcgc gtccgccatc tccagcagcc gcacgcggcg catctcgggc  
1501 agcgttgggt cctggccacg ggtgcgatg atcgtgctc tgtcgttag gaccggcta  
1561 ggctggcggg gttgccttac tggtagcag aatgaatcac cgatacgca gcgaactga  
1621 agcgaactgt gctgcaaac gtctgcgacc tgagcaaca catgaatggt ctccggttc  
1681 cgtgtttcgt aaagtctgga aacgcggaag tcccctacgt gctgctgaag ttgcccga  
1741 cagagagtgg aaccaaccg tgataccacg atactatgac tgagagtcaa cgccatgagc  
1801 ggcctcattt cttattctga gttacaacag tccgcaccgc tgtccgtag ctcttcgg  
1861 tgggcgcggg gcatgactat cgctgccgca cttatgactg tcttcttat catgcaactc  
1921 gtaggacagg tgccggcagc gcccaacagt ccccgccca cggggcctgc caccatacc  
1981 acgccgaac aagcgcctg caccattatg ttccgatct gcatcgagg atgctgctgg  
2041 ctaccctgtg gaacacctac atctgtatta acgaagcgt aaccgtttt atcaggctct  
2101 gggaggcaga ataatgatc atatcgtcaa ttattacct caggggaga gcctgagca  
2161 actggcctca ggcatctgag aagcacacgg tcacactgct tccggtagtc aataaccgg  
2221 taaaccagca atagacataa gcggctattt aacgacctg cctgaaccg acgaccgggt  
2281 cgaatttgct ttcgaatttc tgccattcat ccgcttatta tcaattatc agcgtagca  
2341 ccaggcgttt aaggccacca ataactgcct taaaaaatt acgccccgc ctgcccacta  
2401 tcgcaatact gttgtaattc attaagcatt ctgccgacat ggaagccatc acagacggca  
2461 tgatgaacct gaatcgccag cggcatcagc acctgtcgc cttgcgtata atatttgc



2521 atggtgaaaa cgggggcgaa gaagttgtcc atattggcca cgtttaaatc aaaactgggtg  
2581 aaactcacc agggattggc tgagacgaaa aacatattct caataaaccc tttagggaaa  
2641 taggccaggt tttcacgta acacgccaca tcttgcgaat atatgtgtag aaactgccgg  
2701 aaatcgtcgt ggtattcact ccagagcgat gaaaacgttt cagtttgctc atggaaaacg  
2761 gtgtaacaag ggtgaacact atcccatatc accagctcac cgtctttcat tgccatacgg  
2821 aattccggat gagcattcat caggcgggca agaattgtaa taaaggccgg ataaaacttg  
2881 tgcttatttt tctttacggc ctttaaaaag gccgtaatat ccagctgaac ggtctggtta  
2941 taggtacatt gagcaactga ctgaaatgcc tcaaaatggt ctttacgatg ccattgggat  
3001 atatcaacgg tggatatatc agtgattttt ttctccattt tagcttctt agctcctgaa  
3061 aatctcgata actcaaaaaa tacgcccggg agtgatctta tttcattatg gtgaaagtgtg  
3121 gaacctctta cgtgccgatc aacgtctcat tttcgccaaa agttggccca gggcttcccg  
3181 gtatcaacag ggacaccagg atttatttat tctgcgaagt gatcttccgt cacaggtatt  
3241 tattcggcgc aaagtgcgtc gggatgatgct gccaaactac tgatttagtg tatgatgggtg  
3301 tttttgaggt gctccagtggt cttctgtttc tatcagctgt cctcctgtt cagctactga  
3361 cggggtgggtg cgtaacggca aaagcaccgc cggacatcag cgcaagcggg gtgtatactg  
3421 gcttactatg ttggcactga tgagggtgtc agtgaagtgc ttcattgtggc aggagaaaaa  
3481 aggctgcacc ggtgcgtcag cagaatatgt gatacaggat atattccgct tctcgcctca  
3541 ctgactcgtc acgctcggtc gttcgcactgc ggcgagcggg aatggcttac gaacggggcg  
3601 gagatttcct ggaagatgcc aggaagatac ttaacaggga agtgagaggg ccgcggcaaa  
3661 gccgtttttc cataggctcc gccccctga caagcatcac gaaatctgac gctcaaatca  
3721 gtggtggcga aaccgcacag gactataaaag ataccaggcg tttccccctg gcggtccct  
3781 cgtgcgtctc cctgttctcg cctttcgggt taccgggtgc attccgctgt tatggccgcg  
3841 tttgtctcat tccacgcctg aactcagtt ccgggtaggc agttcgtcc aagctggact  
3901 gtatgcacga accccccgtt cagtcagacc gctgcgcctt atccggtaac tategtcttg  
3961 agtccaacce ggaaagacat gcaaaagcac cactggcagc agccactggt aattgattta  
4021 gaggagttag tcttgaagtc atgcgccggg taaggctaaa ctgaaaggac aagttttggt  
4081 gactgcgctc ctccaagcca gttacctcgg ttcaaagagt tggtagctca gagaacctc  
4141 gaaaaaccgc cctgcaaggc ggttttttcg ttttcagagc aagagattac gcgcagacca  
4201 aaacgatctc aagaagatca tcttattaat cagataaaat atttctagag tttaaacgca  
4261 ggagcaggag tggcatgggg atccggacc cgcgccctag ccgtgtcgtt tctgtgacaa  
4321 agcccacaaa acatcgcgac actgtaggac gaaccttgtc aggactaata cacaaccatt  
4381 tgaaaaatat taattttatt ctctggtatc gcaattgcta gttcgttatc gccaccgcgc  
4441 ttccgcgggtg aaccgcgccc cggcgttttc cgtcaacatc cctggagctg acagcatgtg  
4501 gaattactcc gagaaagtaa aagaccattt ttttaacccc cgcaatgcgc gcgtggtgga  
4561 caacgccaac gcggtaggcg acgtcggttc gtttaagctgc ggcgacgccc tgcgctgat  
4621 gctgcgcgtc gaccgcgaaa gcgaaatcat tgaggaggcg ggcttccaga ccttcggctg  
4681 cggcagcgcc atcgcctcct cctccgcgt gacggagctg attatcgcc ataccctcgc  
4741 cgaagccggg cagataacca atcagcagat tgccgattat ctcgacggac tgccgccgga  
4801 gaaaatgcac tgctcgggtg tgggccagga ggccctgcgc gcggccatcg ccaactttcg  
4861 cggcgaaagc cttgaagagg agcacgacga gggcaagctg atctgcaaat gcttcggcgt  
4921 cgatgaaggg catattcgcc gcgcggtaca gaacaacggg ctgaccacc ttgccgaggt  
4981 gatcaactac accaaagcgg gcggcggctg cactcttgc cacgaaaaaa tcgagctggc  
5041 cctggcggag atcctcgcgc agcagccgca gacgacgcca gccgtggcca gcggcaaaga  
5101 tccgactgg cagagcgtcg tcgataacat cgcagaactg cggccgcata ttcaggccga  
5161 cggcggcgat atggcgttac tcagcgtcac caaccaccag gtgaccgtca gcctctccgg  
5221 cagctgtagc ggctgcatga tgaccgatat gaccctggcc tggtgcgac aaaaactgat  
5281 ggaacgtacc ggctgttata tggaaagtgg ggccggccgaa aatctttatt ttcagtcgga  
5341 aaatctttat tttcagtcga aacaggttta tctcgataac aacgccacca cccgtctgga

5401 cccgatggtc ctggaagcga tgatgccctt tttgaccgat ttttacggca acccctcgtc  
5461 gatacacgat tttggcattc cggcccaggc ggctctggaa cgcgcgcate agcaggctgc  
5521 ggcgctgctg ggcgcggagt atcccagcga gatcatcttt acctcctgcg ccaccegaagc  
5581 caccgccacc gccatcgcct cggcgatcgc cctgctgcct gagcgtcgcg aatcatcac  
5641 cagcgtggtc gaacatccgg cgacgctggc ggctgcgag cacctggagc gccagggcta  
5701 ccggattcat cgcatcgcgg tggatagcga gggggcgcct gacatggcgc agttccgcgc  
5761 ggcgcttagc ccgcgcgtcg cgttggtcag cgtgatgtgg gcgaataacg aaaccggggt  
5821 gcttttcccg atcggcgaaa tggcggagct ggcccatgaa caaggggcgc tgtttcactg  
5881 cgatgcggtg cagggtggcgc gaaaaatacc gatcgccgtg ggccagacc gcategatat  
5941 gctctcctgc tcggcgcata agttccacgg gccaaaaggc gtaggctgtc tttatctgcg  
6001 gcggggaacg cgctttcgcg cgctgctgcg cggcggtcac caggagtacg gtcggcgagc  
6061 cgggacagaa aatatctgcg gaatcgtcgg catgggcgcg gcctgcgagc tggcgaatat  
6121 tcacttgccg ggaatgacgc atatcggcca attgcgcaac aggctggagc atgcctgct  
6181 ggccagcgtg ccgtcggcga tggatagcga cggcggccag ccgcgggtgc ccggcacggt  
6241 gaatctggcc tttgagttaa ttgaaggcga agccattctg ctgctgttaa accaggccgg  
6301 gatcgccgcc tccagcggca gcgcctgcac ctgaggctcg ctggaacct cccacgtgat  
6361 gcgggcgatg aatatcccct acaccgccgc ccacggcacc atccgctttt ctctctcgcg  
6421 ctacacccgg gagaaagaga tcgattacgt cgtcgccacg ctgccgccga ttategaccg  
6481 gctgcgcgcg ctgtcgcctt actggcagaa cggcaagccg cccccggcgg acgccgtatt  
6541 cacgccggtt tacggctaata cccgtcagcc gggactgtgc gggtagcctc ggcggctacc  
6601 cgtaaacgcc tacagcacgg tggtttaaac actagatacg tacagcgcgc caagagattg  
6661 cgtggaataa gacacagggg gcgacaagct gttgaacagg cgacaaagcg ccaccatggc  
6721 cccggcaggc gcaattgttc tgtttcccac atttggcgcg cttattgtgc cgttttgttt  
6781 tacgtcctgc gcggcgacaa ataactaact tcataaaaaat cataagaata cataaacagg  
6841 cacggctggt atgttccctg cacttctctg ctggcaaaca ctcaacaaca ggagaagtca  
6901 ccatgaccat cgtcgaatgc gctatttacg gtaaaggcgg tatcggtaaa tccaccacca  
6961 cgcagaacct cgtcgcgcg ctggcggaga tgggtaagaa agtgatgatc gtcggctgcg  
7021 atccgaaggc ggactccacc cgtctgattc tgcacgcaa agcacagaac accattatgg  
7081 agatggccgc ggaagtcggc tcggctgagg acctcgaact cgaagacgtg ctgcaattg  
7141 gctacggcga tgtgcgctgc gcggaatccg gcggcccgga gccaggcgtc ggctgcgcgg  
7201 gacgcggcgt gatcacggcg atcaactttc ttgaagaaga aggcgcctac gaggacgatc  
7261 tcgatttcgt gttctatgac gtgctcggcg acgtggtctg cggcggcttc gccatgccga  
7321 tccgcgaaaa caaagcccag gagatctaca tcgtctgctc cggcgaaatg atggcgatgt  
7381 acgcggccaa caatatctcc aaagggatcg ttaaatacgc caaatccggc aaggtgcgcc  
7441 tcggcggcct gatctgtaac tcacgtcaga ccgaccgtga agacgaactg attattgccc  
7501 tggcggaaaa gctcgggtacc cagatgatec actttgtgcc ccgcgacaac atcgtgcagc  
7561 gcgcggagat ccgccgcgat acggttatcg agtacgacc cgctgtaaa caggccaacg  
7621 aataccgcac cctggcgcag aagatcgtca acaacacat gaaagtgggt ccgacgccct  
7681 gcaccatgga tgagctggaa tcgctgctga tggagtccgg catcatggaa gaggaagaca  
7741 ccagcatcat tggcaaaacc gccgccgaag aaaacgcggc cgagaacctt tatttccaat  
7801 cggagaatct ttacttccaa tcaatgatga ccaacgcaac gggcgaactg aatctggcgc  
7861 tgatccagga agtcctggag gtgttcccgg aaaccgcgcg aaaagagcgc agaaagcaca  
7921 tgatggctcag cgatccggaa atggagagcg tcggcaagtg cattatctct aaccgcaaat  
7981 cacaaccggc cgtaatgacc gtacgcggct gcgcctacgc cggttccaaa ggggtggtat  
8041 ttgggccgat taaggatatg gcccatattt cgcacggacc ggtcggctgc ggccagtatt  
8101 cccgcgccgg acgacgcaac tactacaccg gactcagcgg cgtcgategc ttggcagcgc  
8161 tgaacttcac ctctgatatt caggagcgcg acatcgtctt cggcggcgat aaaaagctca  
8221 gcaagctgat tgaagagatg gagttgctgt tcccgtcac caaagggatc accattcagt

8281 cggaatgccc ggtggggctg atcggatgatg atatcagcgc ggtggccaac gccagcagca  
8341 aggcgctgga taaaccggtg atccccgtac gctgcgaagg ctttcgcggc gtgtcgcagt  
8401 ctctggggca ccataatgcc aacgacgtgg tgcgcgactg gatcctgaac aatcgcgaag  
8461 gacagccggt tgaaccacc ccttacgatg tggcgcactc cggcgactac aacatcggcg  
8521 gcgacgcctg ggccctcgcg attctgctgg aagagatggg gctacgggta gtcgcgcagt  
8581 ggtccggcga cggcacgctg gtggagatgg agaatacccc attcgtcaag ctgaacctgg  
8641 ttcactgcta ccgttcgatg aactatatcg cccgccatat ggaggagaaa catcagattc  
8701 cgtggatgga gtacaacttc ttcgggccga ccaaaatcgc cgaatcgcct cgcaaaatcg  
8761 ccgaccagtt cgacgatacc attcgcgcga acgccgaagc ggtgatcgcc cggtatgagg  
8821 ggcagatggc ggcgattatc gccaaatata gcccgccct ggaggggct aaggtgctgc  
8881 tctatatggg cggcctgcgg ccgcgccacg ttattggcgc ctatgaggat ctcgggatgg  
8941 agatcatcgc cgcggctac gagtttgcg ataacgatga ttacaccgc accctgccgg  
9001 atctgaaaga gggcacgctg ctgttcgatg acgccagcag ctacgagctg gaagcgttcg  
9061 tcaaggcgct gaagcccgc cttatcggct ccggcatcaa ggaaaaatat atcttcaga  
9121 aaatggcgct gccgttcgcg cagatgcact cgtgggacta ttccggcccg taccacggct  
9181 acgatggttt cgccattttc gcccgcgata tggatatgac cctgaacaac ccggcgtgga  
9241 acgaactgac cgctccgtgg ctgaagtctg cggaaaacct ctacttcag tcggagaatc  
9301 tttactttca gtcaatgagc caaacgattg ataaaattaa tagctgttat ccgctattcg  
9361 aacaggatga ataccaggag ctgttccgca ataagcggca gctggaagag gcgcacgatg  
9421 cgcagcgcgt gcaggaggtc tttgcctgga ccaccaccgc cgagtatgaa gcgctgaatt  
9481 tccagcgcga ggcgctgacc gttgaccgg cgaaaacctg ccagccgctt ggcgcggtgc  
9541 tttgctcgtt gggatttgcc aacacctgc cgtatgtgca cggctctcag gggctcgtgg  
9601 cctactttcg cacctatttt aaccgccatt tcaaagagcc gatcgctgc gtctccgact  
9661 cgatgaccga agacgcggcg gtcttcggcg gcaacaacaa tatgaacctg ggctgcaga  
9721 acgccagcgc gctgtacaaa ccggagatca ttgcggtgtc caccacctgc atggcggaag  
9781 ttatcggcga tgacctgcag gcgtttatcg ccaacgctaa aaaagatggc ttcgtcgaca  
9841 gcagcatcgc cgtgccccac gcccatacgc ccagctttat cggcagccac gtcaccggct  
9901 gggataacat gtttgaaggc ttcgcaaaa cttcactgc ggactaccag gggcagccgg  
9961 gcaaatgcc gaagctcaat ctggtgaccg gctttgaaac ctatctcggc aacttcgcg  
10021 tattaagcg gatgatgga cagatggcgg tgccgtgcag cctgctctcc gatccgctgg  
10081 aagttctcga cacgcccgc gacggccact atcggatgta ttccggcggc accacgcagc  
10141 aggagatgaa agaggcccct gacgccatcg atacgctgct cctgcagccg tggcagctgc  
10201 tgaagagcaa aaaagtgggt caggagatgt ggaaccagcc cgcaccgag gtcgccattc  
10261 cgctggggct ggccgccacc gatgaactgc tgatgaccgt cagccagctt agcggcaagc  
10321 cgattgccga cgcctcacc cttagcgcg gccggctggt tgacatgatg ctgactccc  
10381 acacctggct gcacggcaag aagtttggc tgtacggcga tccggacttc gtgatggcc  
10441 tcaccgctt cctgctggag ctgggctgcg agccaacggt gatcctgagc cataacgcca  
10501 acaaacgctg gcaaaaagcg atgaacaaaa tgctcgcgac ctgcgctac gggcgcgata  
10561 gcgaagtgtt tatcaactgc gatttgtggc acttccgttc gctgatgttc acccgtcagc  
10621 cggactttat gatcggcaac tctacggca agtttatcca gcgcgatacc ctggcgaagg  
10681 gtaaagcctt tgaagtggc cttatccgc tcggctttcc gctgttcgac cgcaccatc  
10741 tgcaccgcca gacaacctgg ggttatgaag gggcgcgata cattgtgacg acgctggtga  
10801 acgccgtgct ggagaaactg gatagcgata ccagccagct gggcaaac gattacagct  
10861 tcgatctcgt ccgttaatcc ctgtttgtg cttgttgcg gctgacccc cgggcttttt  
10921 ttcgcgtatg gacgctcttc cccacgttac gctcagggga atattccgtt cacggttgtt  
10981 ccgggcttct tgatgcgcct aacccccctg ctgccagcct ttcataca aatagccatc  
11041 ccagcgcgat aggtcatata cgtaactaga actagaaaagc ttggcaacc gcgtccctga  
11101 attgtcgcaa ttccgccgcg ctggcgacaa tgtcctgaat ctacataag gcttcaggcg

11161 acccccttat gcggaacgc ggcaggccag ctccccgac gctgttgcca ccacgcgggc  
11221 agcacttcgg agaccggccg ccacgcgccg tcaacgcagg gttcaatgcc ttectgttec  
11281 agctgttgcc acggcgtatg gccgatacgc acgcagaata cggctttaac gtccgccage  
11341 agttcgagga tcgccgcaaa cccggctgcg ttatcctgcg gctcgcagtc atcgcgcccc  
11401 tgacaatatt tgggcgtaaa gcgctcgttg accagcacca taccggcggc cgagaggctg  
11461 taaatgtaga accggtcggc gtgaccaaag tgacaatcaa tgacgtcccc gcggcttgac  
11521 gccacggcga ccaggcaggc gtcacggct tcagattcgc cgcgggtcgc aatgctggcg  
11581 tgcagctgcg cgcgctggtg gaggatcggc agccaggccg ggagactctc tggcgccgga  
11641 agctgggtaa actgctggct gcggctcttcg ccgagcatcc caatggcgtc ggcgcgacac  
11701 tggtagcagt gggatcactg cggcatcact tcgtcgcacc ggctgcgggt ggcggcgagc  
11761 gtctcggcgt cggctccgg ctggccgttg aggccaaaca cctgcccgtg ctccggcctg  
11821 gcgatcagcg gcataatatt atggataaac gcgccgtgg cccgcagcgc gcggctcacg  
11881 tcggccatgc cgctatcgtt gataccgggg atcagcaccg aatttatctt caccagcacg  
11941 cctttggcgg tcagcctgcg tacgccctca agctgacggg caatcaggat ctctcccgt  
12001 tcgcgcccgc tgtagcgttc gccgtccagc catagccagg cgtagatttg cgcggcaate  
12061 tccgcgtcga ggggtgtaat ggtgaccgtg acgtggtaa cgcggacatc cagcaggcgg  
12121 tccaccgct caggcagcat cagtccgttg gtcgacaggc ataatttcag gtccggcagc  
12181 tgttcgcgga tcagctccag ggtgcgaaag gtgcgggga tattggcgag cggatcgccg  
12241 ggcccggcga tgcccaccac cgaaaagtgc gggatcgct cgcgcacctg acgactttc  
12301 acgaccgct gttcaggcgt cagcagcgtt gacgataccc cggggcggga ctctgtgctg  
12361 caatcgaatt tgcgattaca gtagttgcac tgcaaatgc agggggcgc gacgggcaga  
12421 tgcacccgc cgaaacggtg atgcccattg cgagagtagc aggggtgcgc ggcagctta  
12481 tcggccaca gcggcgtcaa tgcgctgtca tccgccggg gcgaggctt gccgccagaa  
12541 aaagaggagc aggaagtaga acctccacct ccggaacct cacctccaga accacctca  
12601 ccgtccgctg cgtacgcgcc acccgtggag agtgacgatt cggggttctg gcgcagcggc  
12661 gatcggtagt gggcgagggt gtggtgacgc tcgcgtatca gtttgccag ctcaaacagc  
12721 gtatcgcgca tcccgtata cccctgtcgc acccggcgga attcggcag cttgtcaaag  
12781 agcggaaaac ccgcgcgcac cagcggcagc gcaaaactgt ccgccaggtc gcggcgctgc  
12841 gagttcgcca ccagcaggtc ggcgggatgc gcgcacagca gggtttgag atctccaga  
12901 tccccggca ccaccgctt caccggcagc tggcgcagc tgggatgacc ggtaggggc  
12961 accagcgggc cgggctgcat cccctggctg ttggcgaaat cacaccagc cgcagcaaa  
13021 tcgcttccg ccgctatcgc catgcgtg cctggagcc acatattgca gtcgatcctc  
13081 gcacctgta gctggccgcg ctggcgttcc agccactcgg gaacggcgcg tccggaatt  
13141 ttcgccagtt gatgaataaa ggcgtcgcag cgttcgaggg tcatcagggt cggcaggcgc  
13201 ataacctgc cgcggcagc cggggccagc agcagatgagg cgcgatgaag ggagacgcca  
13261 atggcgaagc tgcacaggct ttgccccatc tgctctatct ggcgcagcgg cgtcccgcc  
13321 tgggtcagcg gcgagaaatc gccctgcgc aggtggcct ccatcgattg cgcaggtcc  
13381 ggcaggatta tcggctgcag accaaaggct tcgacgcatc ggcgcagcca ctgatatcg  
13441 cccggcgaac agagatggct gaccagcaga ttgaccggc gattgcgtg agccggcgc  
13501 ggcgccggcg gcacccactg ctcaatgacg ctcttaaca ccgcgtgaa gccgttctc  
13561 atggagccat aaaaatccgg cgtgttaacc gtcaatatcg ccaccctt atgccgggga  
13621 tactcttcgc gaaactggcg aaccacgcgg gaaatatcgc tgccctgggc ctccgacagc  
13681 ccggtgctga gcagtacgat agcctgcgga ttgttcgct ggcagagggt atccaggcgc  
13741 gtaaaaatat tgccgtccgc gcccataatc gtcgacgtgg ggtccatcgc cgtcgactgc  
13801 aggggaaccg ggtcgtggaa atgttgaata aaaaagactt tggcgaagc gctgcaccc  
13861 tgcgcgccgt ggaccagagg gatgctgtgt tcgatcccga ggctggcgag gattgcgccg  
13921 agcggctggc cggttttgat ggggctgacc gccagcggct tatcggctgc gaaaatgtct  
13981 gccatcgatt ggaaatacag gttctccgac tgaataata agttctcgc ccacggggc

14041 cgagaatggg tttgcggcca gatggggctg ttgatggtct gacacagctg gcgggcgagg  
14101 gtgacgatcc cctgatagcc agcgaaggcg tgttcgcgct cctgattgat atcgagaaac  
14161 ggcagcctgg ctttatagcc ggtgtacata ttgcgtccgc cggcaatcat caggteggcc  
14221 tgatagcgat agaccacatc cagcagcgtg cgggcgttgc cctcttccag cattaccgcc  
14281 tcttcgccc tcagctcgcg gatccgctgt ttatcctctt cgggtgattt acgcgtgccg  
14341 gttgccacca cggatcatgcc caaatcctgc agcgcggata ccaccgacca ggatttcacc  
14401 ccgccggtat agagcagcgc tttgcggccg cgcagctggt cgcgccacgg ctgtagcgcc  
14461 agttccgccg cctgttccctc ccgcgcaatc agcgttccgg tgcgctggcg aaggtcgtcg  
14521 tcgccagca gcgccgccag ctggcgcagg gcgtcagagg tggcgcggat cccgtaaaag  
14581 ctgccttcga accacggcgt gccgtagcgc tgctccaggg ctctggcgac gttaattaac  
14641 gcccgcgagc agaccagcat attggcctgc gcccggtgca tggctctggat ctggcggaag  
14701 cggccatcac cggagaggct gccgagcacg cggatcccca gttcgtcgag cagcggctga  
14761 atatgccaga actcgcgggc aatattgaat tcgccaatca ggccaatata gtgacgctgc  
14821 tccggggcaa agagcgtgct ctccggccag ggggcgggct cgcgctggcc gatgaccctg  
14881 ttgacatga cgtcgcggc cagccggtta ccgagatttt tactgccgta gaaaccggcg  
14941 gcgtcaatag cgataaccgg tacgccggtg gcggtctgcg cggcctggca taccgcttc  
15001 aggtcatcgc cctccatggc cggtagcag gtgtttaga taaagaccgc cgcggatga  
15061 tagcgggtga cgatatggcg cacggcgtga aacaagcggc gttcgcgcg gcccataatc  
15121 acgtcctggt cgttgagatc ggtggtgaac ccgagccgat taagggtggg gccggagctg  
15181 gcgctgccgc gtttatcca tgagcttccg gcgcagccga tggggccgtg gaccagatgc  
15241 gccacgtcgg cgatgggcag cagggttatc tgcgcgccgt cgaacgcgca gccgccggcg  
15301 gtggcgccgg gtttgggcgc gctgcagccg gatTTTTgtt tatggttggt ttcacaggcc  
15361 ggttcatcca gcagcggcag aatttcattt ccctcatag tgacctggt gacggtgggg  
15421 gatgaggggg aagatgcaat tcgcgctcca gaagcggagc cttgattttt aaagaaaaga  
15481 ggttggttggc tttgcgacaa agccaacaat cggacaaggg atggcggcat gtgatgcttt  
15541 atgacctatc gcgctgggat ggctatttgt tgatgaaagg ctggcagcga gggggttagg  
15601 cgcatacaaga agcaagctta ctagtcttaa gtcacagtcg cggcatggtg atatccataa  
15661 tctgaatgcg ataccgccacc tggcgcgggg tcatgccgag cagccgcgcc gctttggcct  
15721 gcaccagcc cgctttttcc agggcggcga tcagccgctg gcgctcgtcg aggctgttat  
15781 cgagccagcc gtctccgcc gggccgctgc tggcagcgc tttcggcggg ttatcgcgat  
15841 ggttgaacag aatcacgtcc cggctatca ggccgcttc cgacagcacc gccgaacgtt  
15901 cgagacagtt ttccagttcg cgcagtttc ccggccagct gtactccatc agcaggcga  
15961 tcgccccatc gctgatgcgc agcgttcgcc cctggctgtg ggcgattttt cgcaccagaa  
16021 agtgcgccag ctcggcgata tctcctggc gctcgcgcag cggcggcagc gcgataggca  
16081 ttacgttcag gcggtagtat agatcctcgc ggaaatgacc cagccgcacc tctcttcca  
16141 gatggcggtt ggtcggcg ataatagcgca cgttgaccgg cagggtttcg tcgcccgga  
16201 cgcgctccat ctccccctct tgcagaatac gcagtagctt agcctgaaac gaggcgtgc  
16261 tttcggcgat ctcatcgagg aataagggtgc cgccgtccgc cagctcaaag cggcctttcc  
16321 gctggcgcac cgcgccgta aacgcgctt tctcatgacc aacagctcg ctctccagca  
16381 ggttgtccgg cagcggcgc cagttaaatt tgacgaacgc cgcggcggcg cgcggagaat  
16441 tatggtggat ggcgttggcg atgagctctt tcccgtgccc gctctcggc cgtaccagca  
16501 ccgtggtatc ccagcgggaa acctgacgaa taatatccat aatctgccgc atcgccgggc  
16561 tttaccgac catattttcc aggccgaaac cgcgcgaagg ggtacaggcg cgcgggcgt  
16621 ctattctggg gctctgctgc ggcgctgcg cggcggaggt tggcaggatc atcaggcga  
16681 tcgtctgggc gatcagattg gcgacggtt cgagaaagcg cgtgcaggcg ggcagccgt  
16741 ctctctgacg cgccatcgcg tgcggcccca gtacgccgat gggccgggag tggggccca  
16801 tcagcggaac ggcgataaac ggcaggtcat agtcgtacag gctcagacga tcgagaaaac  
16861 gctggtcgtc ggcgacgcgc ggcagcacca gcgactggcc ctgcgccagc acggtaccga

16921 ctaatccttc ccccggccgg tagcgaattt gcgtactgcc gggcagcgtc tgatcttccg  
16981 tttgctgcag cgcttcgatg ctcaggatct cctgctggct gtcgtacagg caaatcatcc  
17041 cgtgctgcat aaaggcatcg ttatgtagca cgctcagaac ctctgcagg gttttgctcg  
17101 ctccgggtggc gcgactcagg accacgctta tccgctgcat ggcggtaaac tgctgggaga  
17161 gatcgaaacg tctgacggtg gtgtccgaat cggatttatg gatcattgct cacctccggt  
17221 cagggtatta aagagcggga aacgcagaac caggctgggt cctccctgcg gtcgcgaagc  
17281 cagttcaatc gcgcccggt gtaggcgac cagcgtttgg atcagccgca gctccatccc  
17341 tttgccggga gagtttaggg catcggggga gtgggcgtag cgcacctgca gcagcgggac  
17401 attgtcgttg agatacaaag agagccagcc ctctctctct tcggcgtaaa gctcgatctc  
17461 cagcggtagc gagggcagct cggcggcgag ggccagcgtc cggtcgagcc ataaactcaa  
17521 gcaggccagc agctgggtac gctggccgaa gccgaccaga tgcggcgatg ccatgtccac  
17581 ctgcagccgc gcgcgatcgt caaagcgggt gcggtagagg gcgtacaggt cgtcaaaaaa  
17641 gggctgaagc ggccagacgg cattgctttc cagctcaaga gaaggcggc agcgtgcag  
17701 gcgcgccatg gcctcttcac ctccgcgcca cgcgcgtcc agcgcacgt tgccgctgcc  
17761 ttcgccgttc agccggcggg ccgccgccag catattgatt gggcaattaa gctgaatcag  
17821 cgccgcgtcc agcgactcgc gaatcgcggc cagcagctta ccggcggtea tttgctgttt  
17881 cagacggtcg agccggccct gctcctgctg ctggcgtgc tgggtacagt cggcgatcac  
17941 catcagcgtg cgcgccgggg cgctgtcgac gaagtagcgg ctggcttctt cactcacgcc  
18001 gggcagcgc cagcaggtta ccgacagcca gcggaccgc ccgcaacca ccaccggcag  
18061 gatttgctcc gcgccgggccc ccattttgcg cggggaaacc tggagctcga ccagcagctc  
18121 tttcccggcg cagtccgcgc agaacgtttt gtaggcgaga ttatccatca ccaccgatc  
18181 ctgctcatcg accacgacca cggcggcggg gatgttattg agcaccgctt ccattagcgt  
18241 catatgattg cgcagccgct gttccagggt atagctgac ctgatatccc gctgcatcgc  
18301 cagataatgc tccagctcgc cctgcggatt cagcaccggc gtgatatcga tatctaccag  
18361 atacaggccg ccgtcgcggg cctgattaat tagctgaccg cgcacggct ggcgtggag  
18421 cagggtttgc cacatctcct ggtagatctc gcgcggcgtc tggctgctgg ccagcaggcg  
18481 cgggttttga ttgagcaatt gcgccagcga gtatccagtc tggcggcaaa acgccgggtt  
18541 ggcgtaggta atattcggcc gggcatcggg gagggaaatc gctaccgatg cctgttcgac  
18601 cattgtaaaa aacagccccg gatgttgttg agtcagcgc caaggcaatc cctcgggtac  
18661 ggcgttatcg agcatcatat tcagggtcat cgcaaaactc tgtgtcgcag ttatgacaat  
18721 ttgtccgaca ccgtgacagg gacgcccggg tgttttccga acggtgataa ccatgcaaac  
18781 cgtgcgccct tatcggcgtg atgtgcagaa acattgatcc ggtaggggaa aagcaggcgc  
18841 tttttgcatt ttaagcggcc cgccagcccc gccgcgcgc gcgggagagg gctgaagcga  
18901 tcgttttggg gcagggatgg gccgcggtag tgcaaaagca cctggcacag ccttcgcaat  
18961 acccctgcga gaacgcgtat tttcaacccc cttttccgac aggagcgcga cacttaagtc  
19021 tagtgctagc tctagtagta ctcagcgcgc acaggggcgg gagaacttga tttcgtcgcg  
19081 ccgggaagat ttagacgcgc gctttcccgg cctgctggat acgctgctta aggtcatgca  
19141 gcaggagaac taaaggcccc ttatgttccg ctctcctgaa actgttgctg atagctctcc  
19201 gcgagcagtc ttcgcgccag cagccagggc gcgcggctgt tatcctcgag ccggttttgc  
19261 agcggcacct ccgcgcggag tttgcgatga aacgttgcca gcaccggcag gctgcagcgg  
19321 ccaagcagct cgggctgata ggggacggcg aaaaactgaa aaaaagattc ggcggagcga  
19381 agttcgtcca cgccgggaat ttgataaaac cactccatca ttgattggaa gtacaagttc  
19441 tccgactgaa aatacagggt tccccctc gcccgagag cggattacc gcacagctcg  
19501 tcgtagatag ccaccagctc gtaatctttc gggctgcgct tccagttctc ggcgaagcgg  
19561 cggatggcgg gcagcagctg gttaatctgc gcggcgttga ggtgatagcc catctgtgca  
19621 aaaacgccgt tgaccgcctg acgcccggag tgtttgccc gcaccagccg gtagctgcgg  
19681 cccatcaggg aagggcgat ggactgtag ctctcgtgt cgcgcagcag cgcgccacg  
19741 tggacacctg actcatgggt aaacaccagc tcgccacca gcggctgctg cgggtcgatg

19801 gcgcgctgcg cggcttccgc gacctctga cagagcgcgg gcagcgcga aaaatgcacg  
19861 ccggtctcca cgccaggca gcgttcaagg cccagcgcga cggtttccag cgccgcgttg  
19921 cccgcccgtc cgccgagacc gaggaccgtc gtattcacgc tggtagcccc ggcgcttacc  
19981 gccgccagcg tattggcggg cgccataccc agatcgttat gggcatgcat ttcgatttcg  
20041 ccggaccaga cgtcgcgcag ggccgagatt tgcgccgcgg tggtaaaagg gtcgagcagg  
20101 ccgaccgtat cggcatagcg caggcgggcg gcggcgcatt gctgcgcgac ctgggcgata  
20161 gcgcgcaggg tctggccgct ggcccgcgag gcgtcctcgc agccgatgca taccttcagg  
20221 ccgaggggat gcgcaagatg gataaacatc gccagccgct ccagcagcac cgccagcggc  
20281 tcgcgcagtt tgtactgccg cagcttatcc gaagccggaa tcgagataac caccagtcg  
20341 atgcccagat cggcgcctcg gcggatctcc agcgcgttca tccgacacca ggtcatcagg  
20401 gtcgcgctcg gcagctggcg acgcaccagc tggatccgcg cgatctctc gtcgccatc  
20461 gccggggtgc cgacctccat cgccgttatt cctgcggcgt aaagcgcctc ggcaatggcg  
20521 accttttcgc tggtagcga ggcgacgcc gggctctgct cgccgtcgcg cagggtggta  
20581 tcgttaatca gcacgcgttc catcgattgg aaatacaggt tctccgactg aaaatataag  
20641 ttctctctct cgccggccag ccgccgatac tgggcaaagc gggcccgcgc gtctctctcg  
20701 gttcggctaa agagcgcac cgccagatgc ggcgtcgttt tgtgcagcga ggcgtagcgc  
20761 acttcgcaa gcaaaaagtc gcggaagctc tctccggct cttcggaatc gagcataaac  
20821 ggcgtcttac cttccgcttc ccgctgcgga tgatagcgc acaggtgcca gtatcccgcc  
20881 tcaaccgcc gtttcgctc gcgctggctg cagcgcatac cggctttcag cccgtggtta  
20941 atgcaggcgg cgtaggcaat caccagcgc ggtcccggcc aggttcggc ctgcccgatc  
21001 gcccgtaggg tctgatcttt atcagcgcgc atcgcgacct gggccacgta cacattgccg  
21061 tagctcatcg ccatcatgcc gagatcttt ttccgctgc gtttgccctg cgcggcaaac  
21121 ttcgcgatgg ccgccaccgg ggtcgattta gacgactggc cgccggtatt ggagtaaacc  
21181 tcggtgtcaa acaccagaat attgacgtct tccccgctc ccagcacgtg atcgagaccg  
21241 ccgaagccga tctcgtaggc ccagccgctc ccgccgaaa tccactgca acgacgaaca  
21301 aaatagtcgc ggttctgcca cagctgctcc aacagcggca cgccctctt ttccgccgc  
21361 agccgttcgc tgagccggtc cgcgcgctc cgggtgccct cgccttcac ctgcttcgcc  
21421 agccactggc gcattgcgtc gctaagtctc tcgctgacc gtagcgcag cgcgccggtc  
21481 atatcatcgg cgatttgtt acgcaccgcc tggccgccga gcacatgcc gaggccaaac  
21541 tccgattat cctcaaacag cgagttcgc catgccgggc catggccgc gtggttggtg  
21601 gtatagggaa tcgacggcgc gctggctccc cagatagaag agcagccggt ggcgttagcg  
21661 atcagcatcc ggtgcgcaaa cagctgggtt atcaggcggg cataaggcgt ttcaccgat  
21721 cccgcgcagg cgccggaaaa ctccagcagc ggggtttcaa actggctgcc tttgaccgtc  
21781 gtcttacgaa acggattgct ctccggcgtc agcgcagcg catagtcca gaccggcgc  
21841 atctgacgct ggctatcgag agactgcatt ttaacgcct tgccgcgcgc gggacagata  
21901 tccacgcagt tgccgcagcc ggaacaatcc agcggcgaga tagccagatg gtagtgatac  
21961 tcttcgctc cctgcgcggg tttgctcagc agcccaaccg gcgcggcgtc atgtcttcg  
22021 ccggttagca gcgccgggcg gatcgccgca tgcgggcaga taaaggcga ctggttacac  
22081 tgcgtgcagc cctccggctg ccagaccggc acttcagcg cgatcccgcg tttctcccac  
22141 gcggcgggtc ccgaaggaaa ggtcccgtc tccataccga cgaacgcgt caccggcagc  
22201 tggtcgccgc actggcgggt catcggctgc agaatacgc ggtatgaaac cggcatcatg  
22261 gctgatgctt gcgcccgggg ttcattcagc gtcgccagc gcgccggaat cgtcacctga  
22321 tgcagcgagg ccatgcccag ctcgatcgc cgctggttca tctcaatcac cgcccccct  
22381 ttgctgccgt agctttttc aaccgcctgc ttgaggtaac ccgcccggt ctgcccgtcg  
22441 ataatgcccg ccagcttaaa gaacgccgc tgcatcagca tattaagcg cccgccagc  
22501 ccgagctcgc gggcgatata cacggcgttc agggataaaa aatggatatt tcccgcgc  
22561 agatagcgtt taaagccgac cggcagatgc tgctccagct ccgcatcga ccagctgcag  
22621 ttgagtaaaa aggtcccgcc cggctttaat ccgtccagca gatcgtagc ctcaacgtag

22681 gactgctgcg aacaggagat aaaatcggcc cgatggatca ggtagggcga attgatcggc  
22741 cggtcgccga agcgtaaatg tgaacggta atgccgccgg attttttcga gtcataagaa  
22801 aagtaggcct gcgcgtagag cggcgtttta tcgccgataa ttttgatcgc gcttttattg  
22861 gccccgacgg tgccgtccga gcccatgccc caaaatttac aggcggtgat gccgtcatgc  
22921 gagaccgcca gcgtctgctg gcgcggcggt aacgaagtaa aggttacatc atcgacaate  
22981 ccgagggtaa acccgtccat cggcagcggg ttattgaggt tatcaaagac ggccgcgata  
23041 tcgttgggca gaacatcctt cccgccaaagc gcatagcggc cgccgacgat tagcggcgca  
23101 tcgtcgtggg ggtagaaggc gtttttcaca tccaggcaca gcggttcage ctgagcggcg  
23161 ggctctttgg tacggcaag gacggcaatc cgctgcacgg ttttcggcag ctgggcgaag  
23221 aagtgggcca gcgaaaaagg gcgaaacaga tgcacgctga gcagcccgac cttctctccc  
23281 gccgcgttca gcgtatccac cacttctcga acggtatcgc agaccgatcc cattgcgata  
23341 atcaccggtt cggcatccgc cgcgccggta tagttaaaca gatgatactc ccggccgggtg  
23401 agcgcgctga tttgcgtcat atagctttcg acaatgctgg gcagcgcctg ataaaaacgg  
23461 ttgcccgcct cccgctcctg gaagtagata tccgggttct gcgccgttcc gcggatgacc  
23521 ggatgatccg gatgcagcgc gttacggcgg aagctgtcga gcgcggggccg gtccagcagc  
23581 gtcgccagct gctcatattc caacacctcg attttttgaa tttcgtcga ggtgcgaaaa  
23641 ccgtcgaaga agttaacaaa cgggatgcgt cccttaatcg ccgccagatg ccccaccgcc  
23701 gacaaatcca tcacctgctg cacgttggtc tccgccagca tcgcgcagcc ggtctggcgg  
23761 accgccatca catcctgggtg atcgccaaaa atattcagcg aattggctgc cagcggccgg  
23821 gcgctgacgt gaaagacgcc cggcagcagt tcaccggcga tttgtacat gttggggatc  
23881 atcagcagca gcccctggga ggccgtatag gtgggtggtg gcgccccggc ctgcagcgcg  
23941 ccgtggaccg cgcctgccgc gccggcctcc gactgcatct ccattaagcg caccggctgg  
24001 ccaaaaagg tctttttccc ctgcgccgcc cactcgtcga cgttttcgc catcggcgtg  
24061 gaggggggta tggggtaaat cgccgcgacc tcggtaaagg cataagatg ccaggccgcc  
24121 gcggcggtgc catccattgt tttcattttt ccggacattg ttcaatctc gaaggtgaga  
24181 ggcatcttcg ccgcctcaaa taagcggcaa acccagttgt tgctcaagc acagcctgtg  
24241 ccagctcgcg gatgacagaa gagtagcgc gaattcaacg cgttatgaag agagtcgccg  
24301 cgcagcgcgc caagagattg cgtggaataa gacacagggg gcgacaagct gttgaacagg  
24361 cgacaaagcg ccaccatggc cccggcaggc gcaattgttc tgtttcccac atttggctgc  
24421 cttattgtgc cgttttgttt tacgtcctgc gcggcgacaa ataactaact tcataaaaat  
24481 cataagaata cataaacagg cacggcagta ctctagtat ttaaattaat cacatttgat  
24541 gatgtgaaaa gccggaggga aacctccggc ttttttgttt gcagcgcgcc cttcgggaaa  
24601 cggtcacaaa acgcgttctt ccagagggtt atccctgta agccgcttcg ccagccacgg  
24661 cggcaaacgg ccggccagca gcgtattgat cgctcgcac tgtgctgaa tcgtcgtccc  
24721 gggctgcgct ttcacgggtt ggatgcgatg gcggatcagc gcgcggcgcg cgggccccgc  
24781 tatctcctgg caaacagca gctgacagtc ctcaataagc cgggcgcgca cttcgttggc  
24841 ctctgctgg tggggggcgg agggatagcg gcgcagatcg tacaaccage cgcttgttc  
24901 atcgaacgcg tagataaaaa acagtcgtcc ctggccgaaa tggccgtaa tcaccagccc  
24961 atcctgggag caaaatgcc ccagcagctg cggcgtgcgc tgggcagggc gaacgatgcg  
25021 taaatgggcg ggcagcgcgc cctgcaggct cgccatcacc cgcgaccage gagcggggga  
25081 catcaccgcc gtcgcggagg gaaagctggc ggccagctgc ggctgggtca ggtcggccag  
25141 acgctctggc gtcagcgtct cgccgctctc ctgcgccage cagtcgacga tttgcgccgg  
25201 ctgtaggtcc ggcagagact gaaacagcgc cagcatacgc cagaataggg tatcgttgtc  
25261 ggacattgat tgaaagtaca agttttccga ttggaaatag agattctccc cgcacagtcc  
25321 cggctgacgg gaaatcatct gttccagcca ctggcgtgta tggcgtgct ggctctgctg  
25381 ccaagataa tcgcgcgcgc tctccagcgc ctgctgcggc tccatgggcg cggcggggcg  
25441 aatcgcttcg caccataaaa gatgccagcc cagttcgtg gcgatgggaa ggcttagcgc  
25501 gttttccgcc agtgaacaca gcgcgggtctc gagctgcgga tagagcaggc cacggcta



25561 ccagcctaaa cgacctctt ccagcgcgct cgggcagtgg gaatggcgct gggccagcgg  
25621 cgcgaaagcg tcccgcgagg cgttgatttg ccgatacagg ccgaggatcc gctggtgcac  
25681 ggcttcgcgg tcgttatcga ccgtcagcag taaatggcgg gtcagacgct gttccgggcg  
25741 cataaactgc gtctggtggc gcagatacca tgctgtacc gtggagagat ccggctgcgg  
25801 cgcctggcgg gcgatatcgg cgaaggcgag ttccagccgg gcgtgatggc gcacgatggc  
25861 agcgcgctcg ggcggcgcaa aatccccctc gtcgagccag atggcaaggg aggcagcgat  
25921 attctccagc aacgccgccg gaatatcgcc ttcagggacc cgcgcgacga tcgtctgctc  
25981 catatggcac tggcgttgcc aggctgttc aaaagccggc gtatcggccg gatccagggc  
26041 cgccggatcg cgattccagc ggctgcgcgc cagccgctgc cgggcaaac gttgccacgg  
26101 gttcattgat tggaaataca agttttctga ctgaaagtaa aggttttcca gcacggtgcg  
26161 tttaatctcc tcaagccagc tcgccagacg cgcttcggtc tggtcgaact ggttatcctg  
26221 atccagcacc agccaacaa agcggtcgcc ttccagcgcc gaggacgcgc tgaattcata  
26281 accctcattt ggccagctgc caatcatctg cgcgccgcgc gcgctcaggg cgtcgaacag  
26341 cgggcgcacg ccgctgacga agttgtccgg atagcctctc tgatcgcca ggccgaacag  
26401 cgccacgggtt ttccctttca ggctggcgtc gtcgaggccg ctgataaatt cgctccatga  
26461 ctcgctttcg catccggcct ccagccccgg cagctggccg tcgccgagcg tcggcgtgcc  
26521 cagcagcagc accggatagg ccataaagtc gtccagcgtc gtgcggttaa tgttgaccgg  
26581 ggcacccgcc agctcgccca gttgcttatg gatcattttc gcgattttgc gggttttacc  
26641 ggtatcgggtg ccaaagaaaa taccaatgtt cgccatgttg cgtcctgtc ggaaaagggg  
26701 gttgaaaata cgcgttctcg caggggtatt gcgaaggctg tgccaggttg ctttgacta  
26761 ccgcggccca tccctgcccc aaaacgatcg cttcagccct ctcccgccgc gcgcggcggg  
26821 gctggcgggg cgcttaaaat gcaaaaagcg cctgcttttc ccctaccgga tcaatgtttc  
26881 tgcacatcac gccgataagg gcgcacgggt tgcatggta tcaccgttcg gaaaacaccg  
26941 cggcgtccct gtcacgggtg cggacaaatt gtcataactg cgacacagga gtttgcgatg  
27001 accctgaaat ttaaatacta ga

//
